# Supplementary material
Source: Elsevier journal article supplement (https://www.sciencedirect.com/science/article/pii/S0001731020302854)
Supplement: mmc1 [file S0001731020302854:mmc1.doc]

Anexo 1. Datos globales recogidos en la encuesta sobre docencia MIR en Dermatología

- Datos generales
  - Edad
  - Sexo
  - Comunidad Autónoma
  - Número MIR
  - Tutores y tutorías
  - Rotaciones externas
  - Cirugía
- Docencia
  - Sesiones clínicas
  - Exámenes
  - Herramientas de innovación
  - Cursos y congresos
- Investigación
  - Sesiones
  - Tesis
  - Comunicaciones y publicaciones
  - Formación en investigación
- Satisfacción general y expectativas
